# Supplementary material
Source: HighWire-hosted journal article supplement (https://gut.bmj.com/content/gutjnl-2021-325209)
Supplement: inline-supplementary-material-3 [file inline-supplementary-material-3.xlsx]

## Sheet: Table S2
Supplementary table 2 The metadata of the participants.
SampleID	Gender	Age	Disease	Comprehensive scores	Stage
HF3	Female	35	Healthy	0	Healthy
HF4	Female	40	Healthy	0	Healthy
HF5	Female	40	Healthy	0	Healthy
HF7	Male	40	Healthy	0	Healthy
HF8	Female	39	Healthy	0	Healthy
HF9	Female	24	Healthy	0	Healthy
HF16	Female	20	Healthy	0	Healthy
HF17	Male	20	Healthy	0	Healthy
HF18	Female	20	Healthy	0	Healthy
HF20	Female	20	Healthy	0	Healthy
HF21	Male	56	Healthy	0	Healthy
HF22	Male	43	Healthy	0	Healthy
HF25	Female	49	Healthy	0	Healthy
HF28	Male	49	Healthy	0	Healthy
HF31	Female	42	Healthy	0	Healthy
HF32	Female	46	Healthy	0	Healthy
HF33	Female	40	Healthy	0	Healthy
HF36	Female	34	Healthy	0	Healthy
HF37	Male	36	Healthy	0	Healthy
HF38	Female	31	Healthy	0	Healthy
HF39	Male	37	Healthy	0	Healthy
HF41	Female	55	Healthy	0	Healthy
HF43	Male	65	Healthy	0	Healthy
HF44	Female	64	Healthy	0	Healthy
HF46	Female	48	Healthy	0	Healthy
HF49	Female	42	Healthy	0	Healthy
HF51	Female	46	Healthy	0	Healthy
RAF25	Female	48	RA	6	S1
RAF44	Male	49	RA	9	S3
RAF58	Female	66	RA	10	S4
RAF61	Male	67	RA	8	S2
RAF63	Female	59	RA	8	S2
RAF66	Female	60	RA	10	S4
RAF68	Female	66	RA	10	S4
RAF70	Male	56	RA	9	S3
RAF71	Male	66	RA	9	S3
RAF74	Male	45	RA	9	S3
RAF75	Female	53	RA	8	S2
RAF77	Female	38	RA	9	S3
RAF78	Male	45	RA	7	S1
RAF79	Female	74	RA	8	S2
RAF80	Female	36	RA	10	S4
RAF81	Female	55	RA	10	S4
RAF84	Female	63	RA	8	S2
RAF86	Female	57	RA	10	S4
RAF87	Female	50	RA	7	S1
RAF88	Female	63	RA	8	S2
RAF89	Female	67	RA	8	S2
RAF90	Female	60	RA	9	S3
RAF92	Female	60	RA	10	S4
RAF95	Female	63	RA	10	S4
RAF96	Female	48	RA	10	S4
RAF101	Male	64	RA	8	S2
RAF102	Female	57	RA	7	S1
RAF104	Male	62	RA	10	S4
RAF106	Female	72	RA	10	S4
RAF107	Female	53	RA	10	S4
RAF111	Female	65	RA	7	S1
RAF112	Female	57	RA	8	S2
RAF113	Female	60	RA	9	S3
RAF116	Male	69	RA	9	S3
RAF117	Female	62	RA	9	S3
RAF118	Female	64	RA	8	S2
RAF120	Female	73	RA	10	S4
RAF122	Female	36	RA	8	S2
RAF123	Female	57	RA	9	S3
RAF124	Male	56	RA	8	S2
RAF125	Female	51	RA	7	S1
RAF126	Male	64	RA	8	S2
RAF127	Male	63	RA	7	S1
RAF128	Female	59	RA	8	S2
RAF129	Female	75	RA	8	S2
RAF131	Male	81	RA	8	S2
RAF132	Female	50	RA	7	S1
RAF135	Female	56	RA	10	S4
RAF137	Female	69	RA	10	S4
RAF138	Female	71	RA	8	S2
RAF139	Female	55	RA	8	S2
RAF140	Female	73	RA	8	S2
RAF141	Female	41	RA	9	S3
RAF142	Female	66	RA	8	S2
RAF143	Female	70	RA	10	S4
RAF146	Female	70	RA	9	S3
RAF147	Female	62	RA	8	S2
RAF149	Female	52	RA	7	S1
RAF150	Female	55	RA	9	S3
RAF151	Female	69	RA	9	S3
RAF153	Male	79	RA	7	S1
RAF158	Female	54	RA	7	S1
RAF159	Female	52	RA	9	S3
RAF160	Female	68	RA	7	S1
RAF161	Female	46	RA	9	S3
RAF166	Female	50	RA	7	S1
RAF167	Female	48	RA	10	S4
RAF170	Female	38	RA	10	S4
RAF174	Female	71	RA	10	S4
RAF177	Female	76	RA	9	S3
RAF179	Male	64	RA	9	S3
RAF180	Female	57	RA	10	S4
RAF184	Female	52	RA	7	S1
RAF185	Female	50	RA	10	S4
RAF186	Female	56	RA	7	S1
RAF187	Female	60	RA	10	S4
OAF33	Female	72	OA	3	OA
OAF39	Male	37	OA	2	OA
OAF40	Female	63	OA	3	OA
OAF41	Female	66	OA	3	OA
OAF43	Female	73	OA	3	OA
OAF44	Female	70	OA	3	OA
OAF45	Female	70	OA	3	OA
OAF46	Female	68	OA	3	OA
OAF49	Female	57	OA	3	OA
OAF53	Male	74	OA	3	OA
OAF54	Female	66	OA	3	OA
OAF63	Male	65	OA	2	OA
OAF66	Female	69	OA	3	OA
OAF68	Female	73	OA	2	OA
OAF69	Male	72	OA	2	OA
OAF70	Female	59	OA	3	OA
OAF74	Female	64	OA	2	OA
OAF77	Female	64	OA	2	OA
OAF79	Female	58	OA	3	OA
